# Supplementary material for: Highly efficient and ultra-narrow bandwidth orange emissive carbon dots for microcavity lasers
Source: Royal Society of Chemistry journal article supplement (doi:10.1039/c9nr03448j), 2019-01-01
Supplement: c9nr03448j1.pdf [file c9nr03448j1.pdf]

## Supporting Information

# Highly Efficient and Ultra-Narrow Bandwidth Orange Emissive Carbon Dots for Microcavity Lasers

*Zhixia Han,<sup>†ad</sup> Yiqun Ni,<sup>†b</sup> Junkai Ren,<sup>†a</sup> Wenfei Zhang,<sup>\*b</sup> Yunfeng Wang,<sup>c</sup> Zheng*

*Xie,<sup>\*a</sup> Shuyun Zhou,<sup>\*a</sup> and Siu Fung Yu<sup>c</sup>*

<sup>a</sup>Key Laboratory of Photochemical Conversion and Optoelectronic Materials,  
Technical Institute of Physics and Chemistry, Chinese Academy of Sciences, Beijing,  
100190, China.

<sup>b</sup>Shenzhen Key Laboratory of Laser Engineering, College of Optoelectronic  
Engineering, Shenzhen University, Shenzhen, 518060, China.

<sup>c</sup>Department of Applied Physics, The Hong Kong Polytechnic University, Hong  
Kong, China.

<sup>d</sup>University of Chinese Academy of Sciences, Beijing, 100049, China.

\*Corresponding Author: E-mail: zhengxie@mail.ipc.ac.cn; zhangwf@szu.edu.cn;  
zhou\_shuyun@mail.ipc.ac.cn.

<sup>†</sup>These authors contributed equally to this paper.

## METHODS

*Materials:* 1, 4-diaminonaphthalene (AR, 97%) was purchased from Alfa Aesar, part of Thermo Fisher Scientific. Dichloromethane, acetone, dimethyl formamide and ethanol were analytical pure and bought from Sinopharm Chemical Reagent Co., Ltd. All the reagents used as received without further purification. Deionized water was used in all experimental processes.

*Synthesis of CDs:* 1, 4-diaminonaphthalene (0.05 g) was ultrasonic dissolved in ethanol (20 mL) to form a transparent solution. Then, the solution was sealed into autoclaves and placed in oven for heating at 200 °C for 12 hours. After cooling to room temperature, the obtained suspensions were purified with a silica column chromatography using dichloromethane and methanol as the eluent. Finally, four CDs were obtained with violet, blue, green and orange emission named v-CDs, b-CDs, g-CDs and o-CDs after evaporation to remove the eluent.

*Microcavity fabrication and lasing measurement:* The microcavity was fabricated by coating the o-CDs on a glass fiber (diameter ~6 μm). The bottle-like microcavity was formed by surface tension of the o-CDs. The 532 nm pulsed laser (continuum surelite II) was focused into a stripe, which was perpendicular to the length of the glass fiber on the microcavity through a semi-cylindrical lens, and light emission was coupled into a spectrometer (Horiba iHR 320) via an optical fiber. For lasing measurement under different temperature, the measurement was performed in a temperature controllable heating and freezing stage (linkam HFS-600).

*Characterizations:* JEM- 2100F instrument (JEOL, Japan) and Multimode 8

instrument (Bruker, Germany) were used to investigate the morphologies of CDs including TEM and AFM images. Excalibur HE 3100 (Varian, USA) and ESCALab250i-XL electron spectrometer (Thermo Fisher Scientific, UK) were used to record the chemical constitutions, such as FT-IR and XPS of CDs. Fluorescence spectra, UV–vis absorption and transmittance spectra were measured on F-4500 instrument (Hitachi, Japan) and U-3000 instrument (Hitachi, Japan). The resolved fluorescence lifetimes measurement was recorded using LP920 instrument (Edinburgh instruments, UK). Absolute QYs were obtained using an integrating sphere connected by a FLS980 system (Edinburgh Instruments, UK).

**Table S1.** The dimension and optical parameters of as-prepared four CDs.

| CDs   | PL (nm) | FWHM (nm) | Abs. (nm) | QYs (%) | average diameter (nm) | size distribution (nm) | $\tau_{\text{avg}}$ (ns) | $E_g$ (eV) |
|-------|---------|-----------|-----------|---------|-----------------------|------------------------|--------------------------|------------|
| v-CDs | 445     | 84        | 411       | 18      | 4.0                   | 2.0-5.5                | 3.21                     | 2.78       |
| b-CDs | 452     | 54        | 420       | 26      | 3.7                   | 2.7-5.3                | 7.03                     | 2.70       |
| g-CDs | 557     | 80        | 451       | 46      | 3.5                   | 2.0-5.0                | 8.25                     | 2.24       |
| o-CDs | 581     | 30        | 532, 570  | 82      | 2.7                   | 2.0-3.2                | 10.13                    | 2.03       |

**Table S2.** The illustration of reported CDs with their emission wavelengths, full width at half maximum (FWHM) and quantum yields (QYs).

| $\lambda_{\text{em}}$ (nm) | FWHM (nm)* | QYs (%) | Source                                       |
|----------------------------|------------|---------|----------------------------------------------|
| 441                        | 82         | 88      | <i>Adv. Mater.</i> , 2012, 24, 1716.         |
| 450                        | 54         | 94      | <i>Scientific Reports</i> , 2014, 4, 5214.   |
| 519                        | 38         | 63      | <i>J. Mater. Chem. C</i> , 2013, 1, 4902.    |
| 443                        | 108        | 54      | <i>Small</i> , 2018, 14, 1800612.            |
| 515                        | 97         | 41      |                                              |
| 572                        | 85         | 51      |                                              |
| 715                        | 71         | 43      |                                              |
| 745                        | 55         | 13      |                                              |
| 430                        | 80         | 75      | <i>Adv. Mater.</i> 2017, 29, 1604436.        |
| 513                        | 95         | 73      |                                              |
| 535                        | 71         | 58      |                                              |
| 565                        | 85         | 53      |                                              |
| 604                        | 90         | 12      |                                              |
| 570                        | 90         | —       | <i>Adv. Mater.</i> , 2015, 27, 1663.         |
| 580                        | 95         |         |                                              |
| 608                        | 95         |         |                                              |
| 435                        | 65         | 10.4    | <i>Angew. Chem. Int. Ed.</i> 2015, 54, 5360. |
| 535                        | 70         | 4.8     |                                              |
| 604                        | 75         | 20.6    |                                              |

|                          |                         |         |                                                  |
|--------------------------|-------------------------|---------|--------------------------------------------------|
| 580<br>625               | 95<br>95                | —<br>24 | <i>ACS Nano</i> , 2016, 10, 484.                 |
| 580                      | 120                     | 46      | <i>Adv. Mater.</i> , 2016, 28, 3516.             |
| 568                      | 90                      | 32.5    | <i>ACS Appl. Mater. Inter.</i> , 2015, 7, 23231. |
| 680                      | 100                     | —       | <i>Nat. Commun.</i> , 2014, 5, 596.              |
| 570<br>609<br>628<br>680 | 115<br>125<br>120<br>85 | —       | <i>Nanoscale</i> , 2015, 8, 729.                 |
| 610<br>710               | 110<br>120              | 7<br>6  | <i>Angew. Chem. Int. Ed.</i> , 2015, 54, 2970.   |
| 555<br>630               | 120<br>145              | —       | <i>Chem. Commun.</i> , 2015, 51, 2544.           |
| 683                      | ~30                     | 16.8    | <i>Nanoscale</i> , 2016, 8, 17350.               |
| 640                      | 80                      | 22.9    | <i>Chem. Mater.</i> , 2016, 28, 8659.            |
| 710                      | 90                      | 26.28   | <i>Adv. Mater.</i> , 2017, 29, 1603443.          |
| 640                      | 125                     | 9.6     | <i>Small</i> , 2017, 13, 1700075.                |
| 628                      | 75                      | 53      | <i>Adv. Mater.</i> , 2017, 29, 1702910.          |
| 598                      | 30                      | 54      | <i>Nat. Commun.</i> 2018, 9, 2249                |

\* The FWHM is estimated according to photoluminescence spectra.

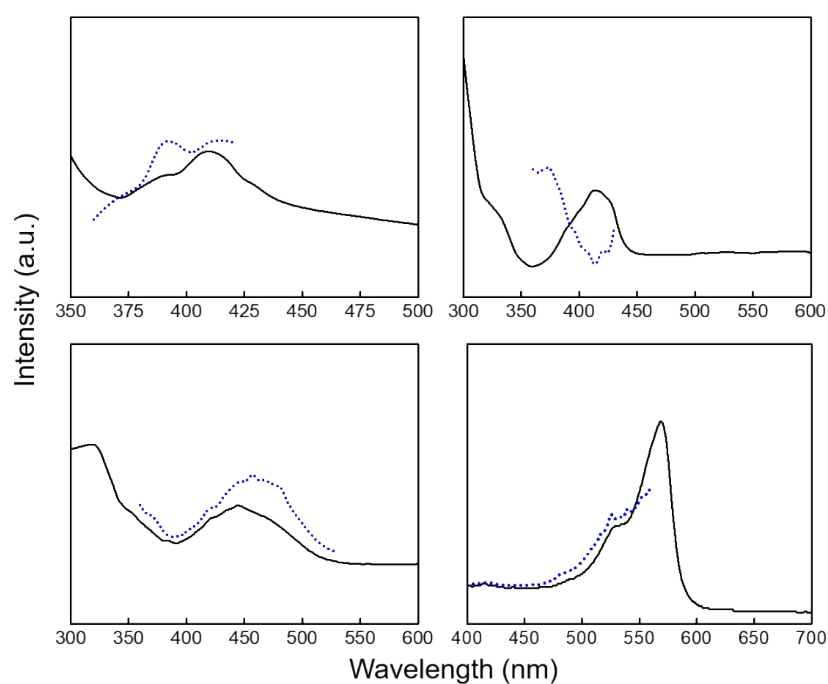

**Fig. S1.** UV-vis absorption (black line) and PL excitation spectrum (blue dotted line, emission wavelength are their emission peak) of v/b/g/o-CDs.

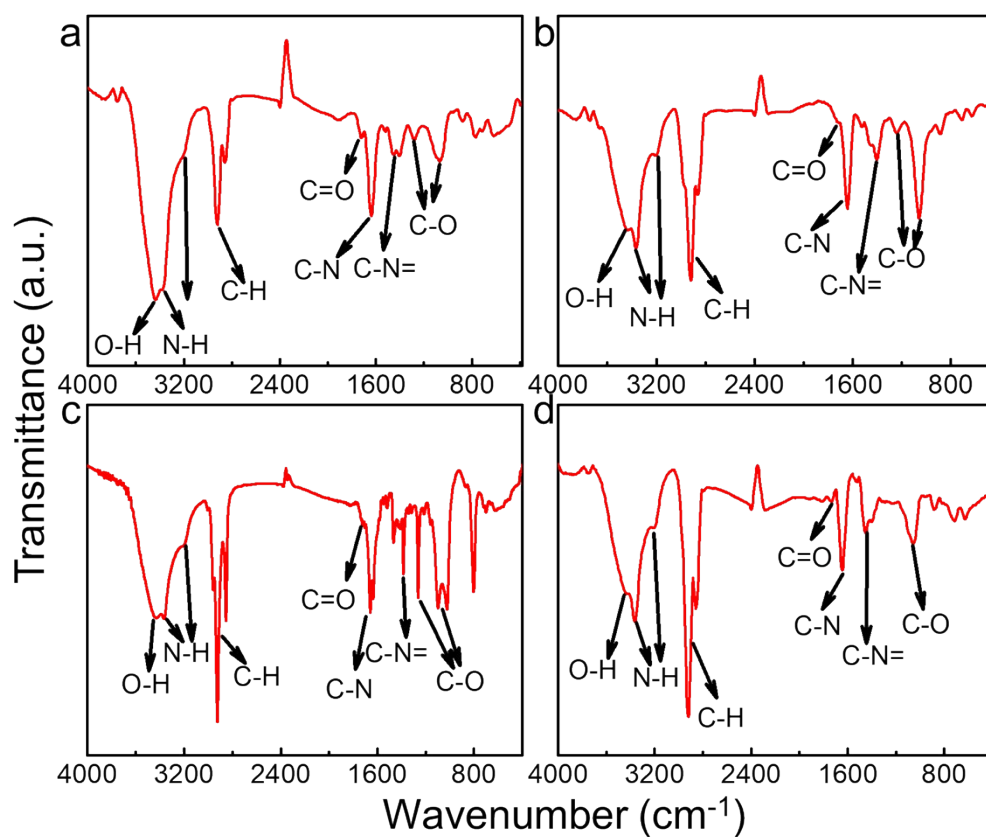

**Fig. S2.** FT-IR spectra of v-CDs (a), b-CDs (b), g-CDs (c) and o-CDs (d).

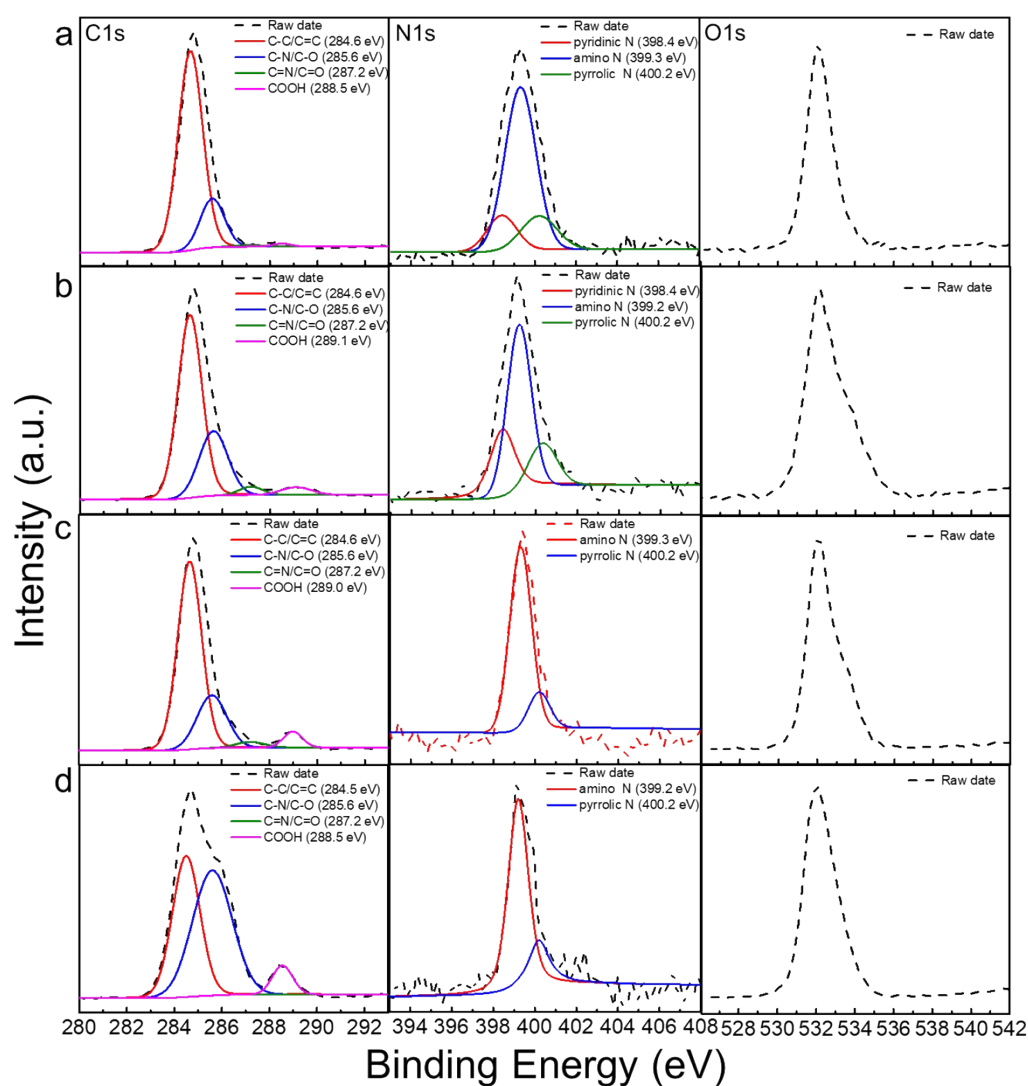

**Fig. S3.** High-resolution XPS C1s, N1s, and O1s spectra of v-CDs (a), b-CDs (b), g-CDs (c) and o-CDs (d).

**Table S3.** The relative contents of C, N and O atoms for v/b/g/o-CDs according to XPS surveys.

| Samples | C (%) | O (%) | N (%) |
|---------|-------|-------|-------|
| v-CDs   | 80.98 | 14.25 | 4.77  |
| b-CDs   | 79.77 | 16.44 | 3.79  |
| g-CDs   | 72.09 | 24.97 | 2.94  |
| o-CDs   | 67.89 | 29.78 | 2.33  |

**Table S4.** XPS analyses of the C1s (1), N1s (2) and O1s (3) spectra of v/b/g/o-CDs.

(1)

| Samples | C=C/C-C (%) | C-N/C-O (%) | C=N/C=O (%) | COOH |
|---------|-------------|-------------|-------------|------|
| v-CDs   | 79.59       | 18.66       | 0.82        | 0.93 |
| b-CDs   | 70.12       | 24.19       | 2.50        | 3.19 |
| g-CDs   | 69.62       | 23.37       | 2.47        | 4.54 |
| o-CDs   | 41.86       | 51.00       | 1.01        | 6.13 |

(2)

| Samples | Pyridinic N (%) | Amino N (%) | Pyrrolic N (%) |
|---------|-----------------|-------------|----------------|
| v-CDs   | 14.62           | 68.97       | 16.41          |
| b-CDs   | 27.87           | 55.53       | 16.60          |
| g-CDs   | 0               | 84.24       | 15.76          |
| o-CDs   | 0               | 76.20       | 23.80          |

**Table S5.** PL decay lifetimes  $\tau$  and the relative fluorescence intensity percentages  $f$  for CDs' ethanol solution, and  $\chi^2$  is the reduced Chi-Square value for  $\tau_{\text{avg}}$ .

| Sample | $\tau_1$ | $f_1$  | $\tau_2$  | $f_2$  | $\tau_{\text{avg}}$ | $\chi^2$ |
|--------|----------|--------|-----------|--------|---------------------|----------|
| v-CDs  | 2.308 ns | 85.87% | 8.713 ns  | 14.13% | 3.21 ns             | 2.035    |
| b-CDs  | 1.633 ns | 0.01%  | 7.029 ns  | 99.99% | 7.03 ns             | 1.938    |
| g-CDs  | 2.005 ns | 7.33%  | 8.741 ns  | 92.67% | 8.25 ns             | 1.282    |
| o-CDs  | 4.404 ns | 5.05%  | 10.433 ns | 94.95% | 10.13 ns            | 1.283    |



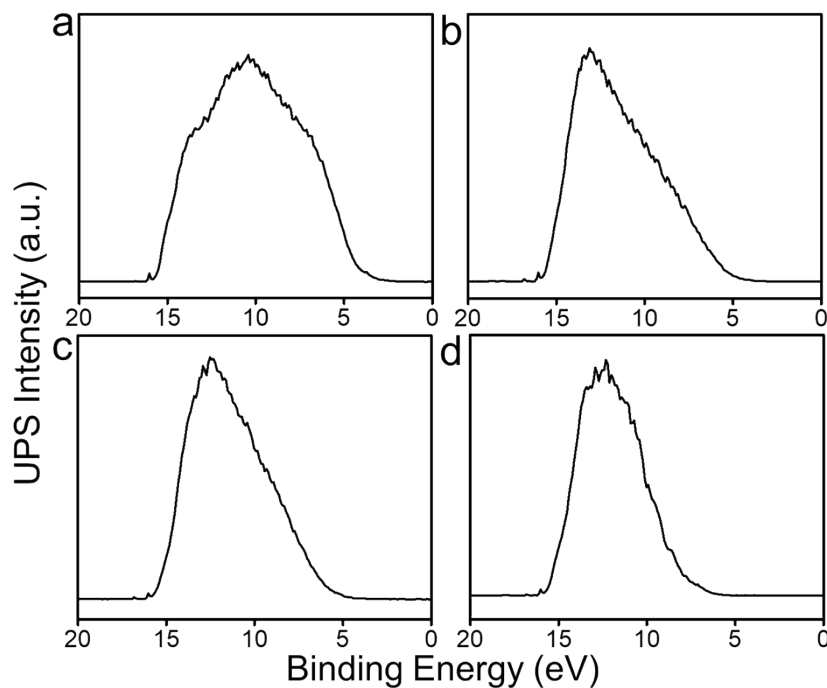

**Fig. S4.** UPS spectra of v/b/g/o-CDs.

**Table S6.** The calculation results of energy level of CDs according to UV-vis spectra and UPS spectra.

| Sample              | v-CDs | b-CDs | g-CDs | o-CDs |
|---------------------|-------|-------|-------|-------|
| E <sub>g</sub> (eV) | 2.78  | 2.70  | 2.24  | 2.03  |
| HOMO (eV)           | 9.55  | 10.75 | 11.36 | 12.22 |
| LUMO (eV)           | 12.33 | 13.45 | 13.60 | 14.25 |

Energy gap is calculated by this equation:

$$E_g = \frac{hc}{\lambda_{Abs}}$$

Where  $h=4.13 \times 10^{-15}$  eV·s and  $c=3 \times 10^8$  m·s<sup>-1</sup>.  $\lambda_{Abs}$  is UV cut-off wavelength<sup>1</sup>.

Work function is calculated by this equation:

$$\Phi = h\nu - (E_{cutoff} - E_{Fermi})$$

Where  $h\nu=21.22$  eV,  $E_{cutoff}$  is the cutoff of secondary electron and  $E_{Fermi}$  is the Fermi level<sup>2</sup>.

HOMO is calculated by this equation:

$$E_g = LUMO - HOMO$$

Take o-CDs for an example:

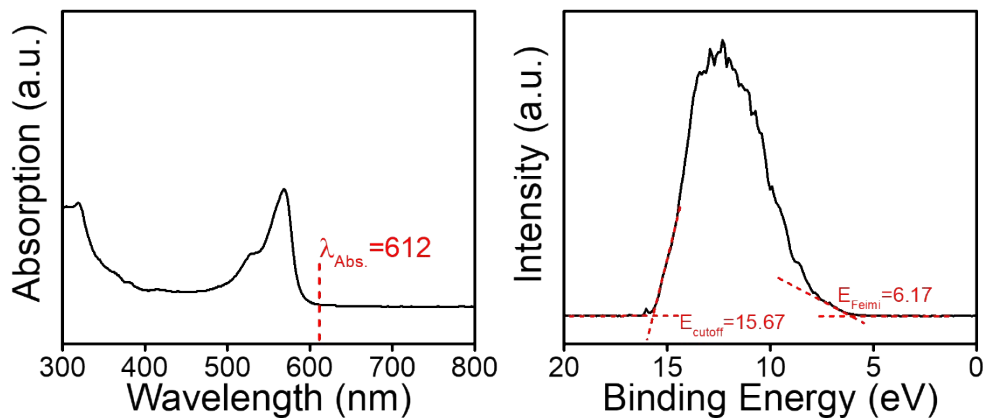

$$E_g = 1240/612 \text{ eV} \approx 2.03 \text{ eV}; \text{ HOMO} = 21.22 - (15.67 - 6.17) \approx 12.22 \text{ eV};$$

$$\text{LUMO} = 12.22 + 2.03 = 14.25 \text{ eV}$$

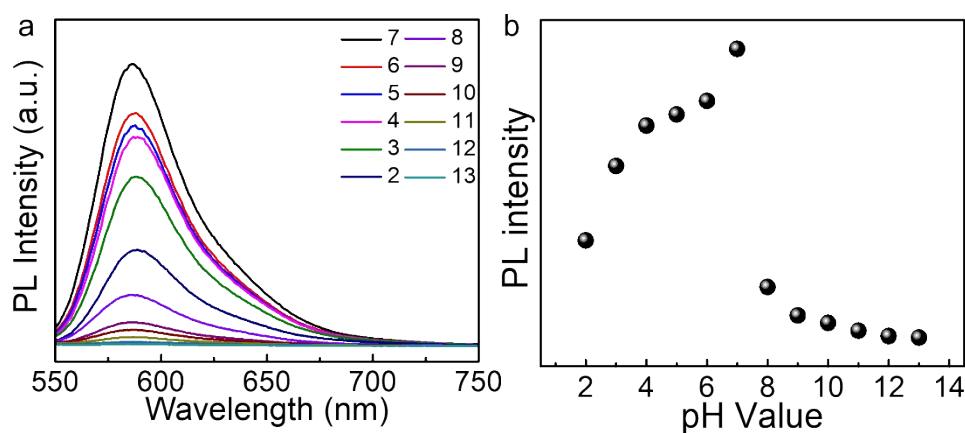

**Fig. S5.** (a) PL spectra ( $\lambda_{ex} = 581 \text{ nm}$ ) of o-CDs in different pH surroundings; (b) The relationship between PL intensity and pH value.

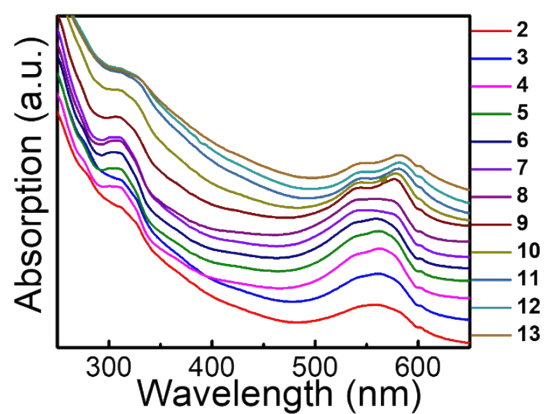

**Fig. S6.** UV–Vis absorption spectra of o-CDs in different pH surroundings

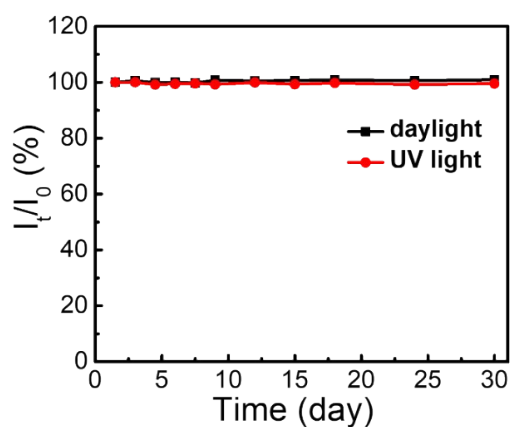

**Fig. S7.** The photostability of o-CDs ethanol solution under continuous radiation with daylight and 365 nm UV light for one month.

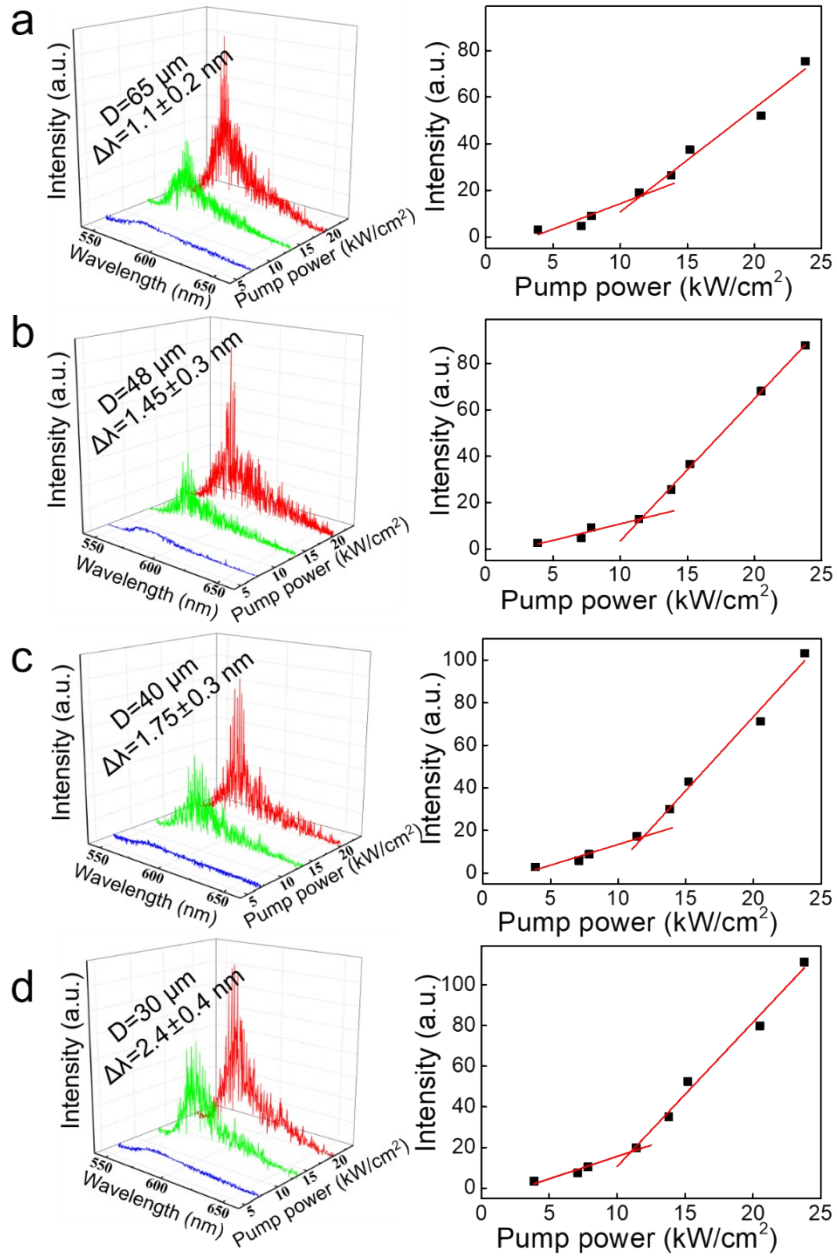

**Fig. S8.** Lasing spectra of the microcavity and plot of lasing intensity to different pump powers with different diameters D of 65  $\mu\text{m}$  (a), 48  $\mu\text{m}$  (b), 40  $\mu\text{m}$  (c), 30  $\mu\text{m}$  (d).

## References

- [1] Sista, P.; Hao, J.; Elkassih, S.; Sheina, E.; Biewer, M.; Janesko, B.; Stefan, M. Synthesis, characterization, and computational modeling of benzodithiophene donor–acceptor semiconducting polymers. *J. Polym. Sci. Polym. Chem.* **2011**, *49*, 4172-4179.
- [2] Zhong, J.; Qin, X.; Zhang, J.; Kera, S.; Ueno, N.; Wee, A.; Yang, J.; Chen, W. Energy level realignment in weakly interacting donor-acceptor binary molecular networks. *ACS Nano* **2014**, *8*, 1699-1707.
